# Supplementary material for: Controllable synthesis of hollow and porous Ag/BiVO4 composites with enhanced visible-light photocatalytic performance
Source: Royal Society of Chemistry journal article supplement (doi:10.1039/c3ra43691h), 2013-01-01
Supplement: c3ra43691h.pdf [file c3ra43691h.pdf]

## Electric Supplementary Information

# Controllable synthesis of hollow and porous Ag/BiVO<sub>4</sub> composites with enhanced visible-light photocatalytic performance

Lang Chen,<sup>a,‡</sup> Rui Huang,<sup>a,‡</sup> Ying-Jie Ma,<sup>a</sup> Sheng-Lian Luo,<sup>a</sup> Chak-Tong Au<sup>a,b</sup> and Shuang-Feng Yin<sup>\*,a</sup>

<sup>a</sup> State Key Laboratory of Chemo/Biosensing and Chemometrics, College of Chemistry and Chemical Engineering, Hunan University, Changsha 410082, Hunan, China

<sup>b</sup> Department of Chemistry, Hong Kong Baptist University, Kowloon Tong, Hong Kong

<sup>‡</sup>The authors contributed equally.

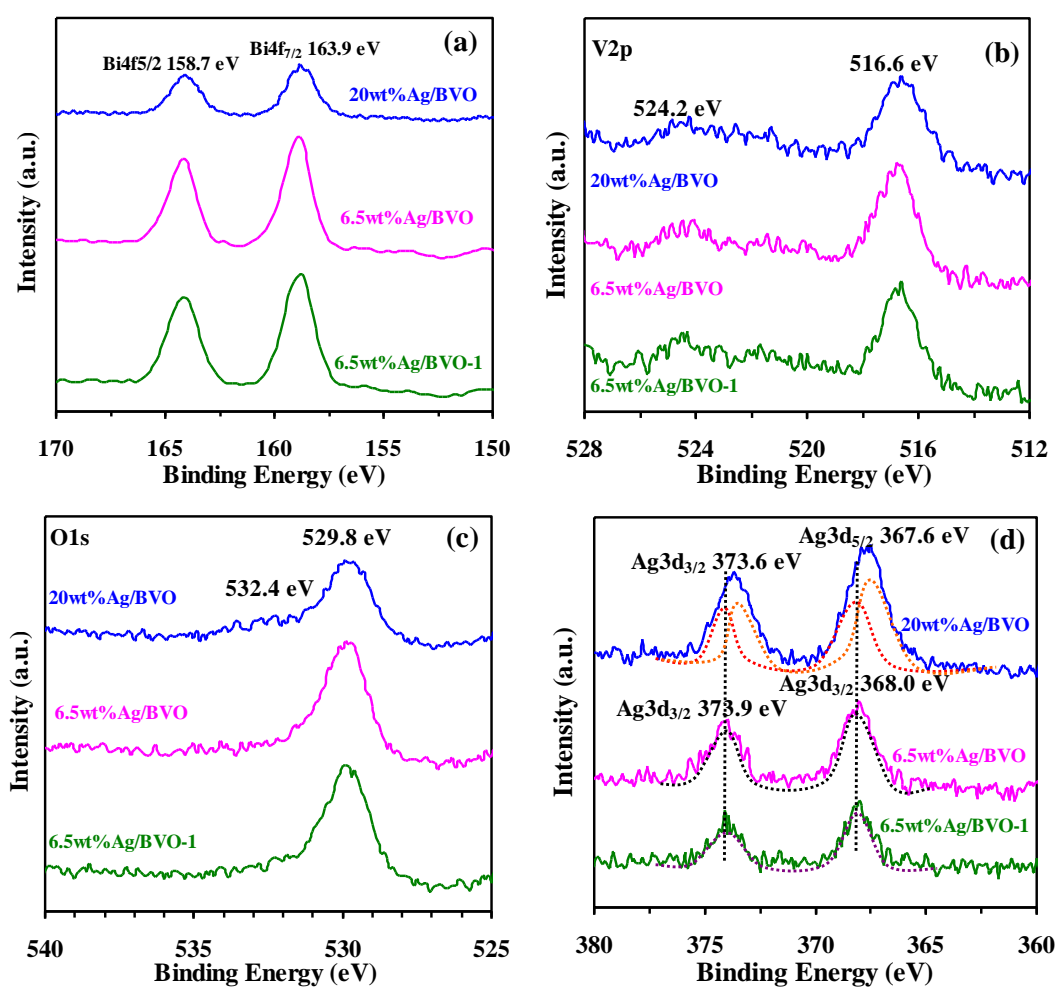

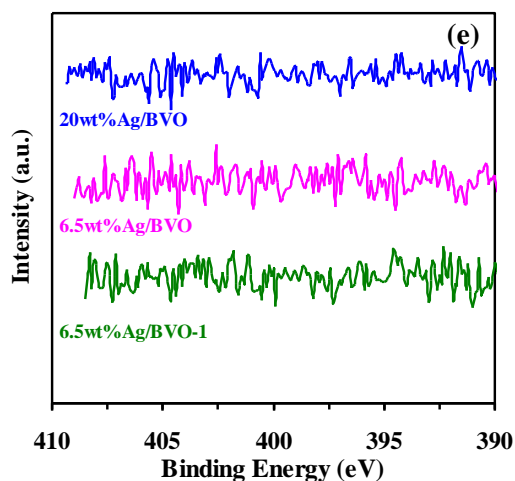

**Fig. S1** XPS spectra of as-prepared samples: (a) Bi4f, (b) V2p, (c) O1s, (d) Ag 3d, and (e) N1s.

**Table S1** Total amount of Ag and the amount of Ag metal on the surface of the as prepared samples.

| Samples         | Bi/V molar ratio | Total Ag (wt%) | Ag <sup>0</sup> /Ag <sup>+</sup> | Metal Ag (wt%) |
|-----------------|------------------|----------------|----------------------------------|----------------|
| 3.3 wt%Ag/BVO   | 1.03             | 2.4            | No Ag <sup>+</sup>               | 2.4            |
| 6.5 wt%Ag/BVO   | 1.01             | 6.1            | No Ag <sup>+</sup>               | 6.1            |
| 6.5 wt%Ag/BVO-1 | 1.01             | 5.7            | No Ag <sup>+</sup>               | 5.7            |
| 13 wt%Ag/BVO    | 1.05             | 8.2            | 1.3                              | 4.6            |
| 20 wt%Ag/BVO    | 1.05             | 14.1           | 1.1                              | 7.4            |

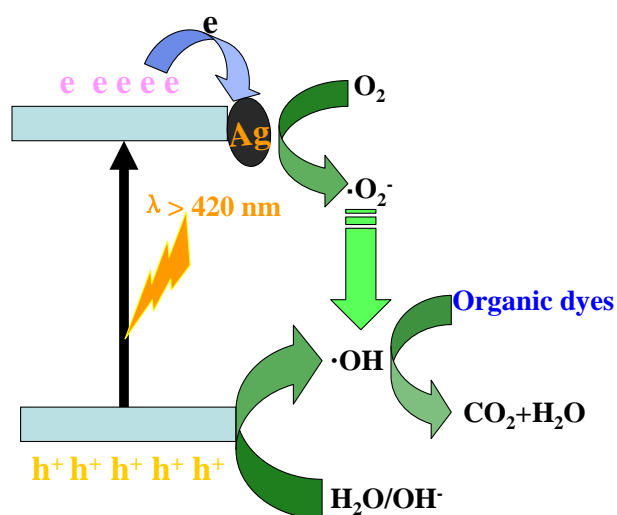

**Fig. S2** Separation mechanism of photogenerated charge carriers in the Ag/BVO composite.

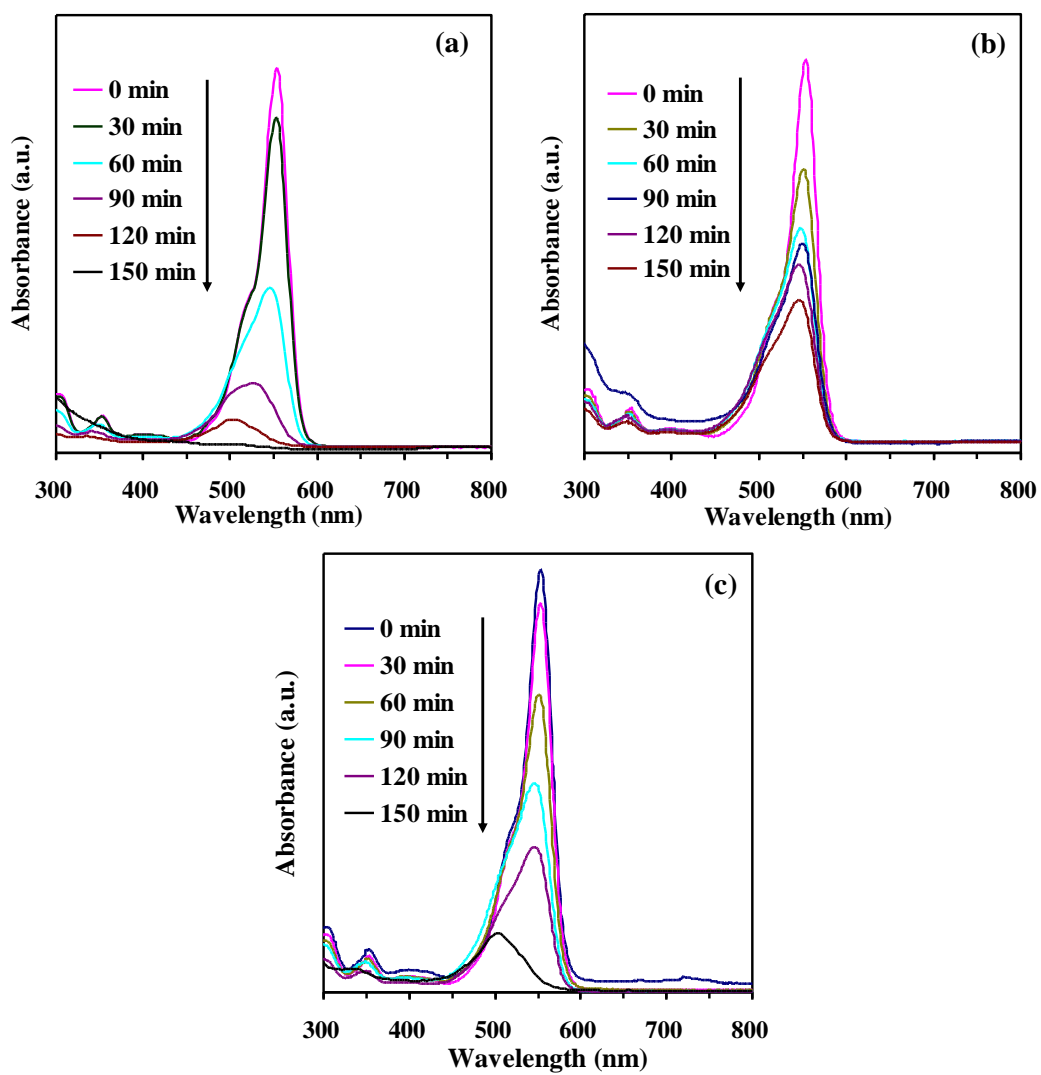

**Fig. S3** UV-vis absorption spectra of Rh-B solution (20 mg/L) irradiated under visible light for different time intervals in the presence of 50 mg (a) 6.5wt%Ag/BVO, (b) BVO and (c) 6.5wt%Ag/BVO-1
